# Supplementary material for: Crystal Structures of T. b. rhodesiense Adenosine Kinase Complexed with Inhibitor and Activator: Implications for Catalysis and Hyperactivation
Source: PubMed Central journal article supplement (PMC3101181; doi:10.1371/journal.pntd.0001164), 2011-05-24
Supplement: pntd.0001164.s003.pdf [file pntd.0001164.s003.pdf]

**Table S1.** A comprehensive summary of all adenosine kinase structures published as of 2010, including the TbrAK structures presented in this work.

| PDB code | species                  | ligand                                                                                                                                                                                                                                                                             | lid domain conformation |
|----------|--------------------------|------------------------------------------------------------------------------------------------------------------------------------------------------------------------------------------------------------------------------------------------------------------------------------|-------------------------|
| 3OTX     | <i>T. b. rhodesiense</i> | diadenosine pentaphosphate (AP5A)                                                                                                                                                                                                                                                  | closed                  |
| 2XTB     | <i>T. b. rhodesiense</i> | 4-[5-(4-phenoxyphenyl)-2H-pyrazol-3-yl]-morpholine (compound <b>1</b> )                                                                                                                                                                                                            | open                    |
| 1BX4 [1] | <i>H. sapiens</i>        | two adenosines                                                                                                                                                                                                                                                                     | closed                  |
| 2I6A [2] | <i>H. sapiens</i>        | 5-iodo-5'-deoxytubercidin                                                                                                                                                                                                                                                          | closed                  |
| 2I6B [2] | <i>H. sapiens</i>        | alkynylpyrimidine compound:<br>5-[4-(dimethylamino)phenyl]-6-[6-morpholin-4-ylpyridin-3-ylethynyl]pyrimidin-4-ylamine                                                                                                                                                              | open                    |
| 1DGM [3] | <i>T. gondii</i>         | adenosine                                                                                                                                                                                                                                                                          | open                    |
| 1LIO [4] | <i>T. gondii</i>         | apo                                                                                                                                                                                                                                                                                | open                    |
| 1LIK [4] | <i>T. gondii</i>         | two adenosines                                                                                                                                                                                                                                                                     | closed                  |
| 1LII [4] | <i>T. gondii</i>         | adenosine, $\beta,\gamma$ -methylene-adenosine 5'-triphosphate (AMP-PCP, a nonhydrolysable ATP analog)                                                                                                                                                                             | closed                  |
| 1LIJ [4] | <i>T. gondii</i>         | 7-iodotubercidin, $\beta,\gamma$ -methylene-adenosine 5'-triphosphate (AMP-PCP, a nonhydrolysable ATP analog)                                                                                                                                                                      | closed                  |
| 2ABS [5] | <i>T. gondii</i>         | $\beta,\gamma$ -methylene-adenosine 5'-triphosphate (AMP-PCP, a nonhydrolysable ATP analog) in two different conformations still undefined density in the adenosine binding site, 6-[(4-nitrobenzyl)thio]-9- $\beta$ -D-ribofuranosylpurine was added in the crystallization setup | semi-closed             |
| 2A9Y [6] | <i>T. gondii</i>         | two N <sup>6</sup> ,N <sup>6</sup> -dimethyladenosine                                                                                                                                                                                                                              | semi-closed             |
| 2A9Z [6] | <i>T. gondii</i>         | N <sup>6</sup> ,N <sup>6</sup> -dimethyladenosine, $\beta,\gamma$ -methylene-adenosine 5'-triphosphate (AMP-PCP, a nonhydrolysable ATP analog)                                                                                                                                     | semi-closed             |
| 2AA0 [6] | <i>T. gondii</i>         | two 6-methyl mercaptopurine riboside                                                                                                                                                                                                                                               | semi-closed             |
| 2AB8 [6] | <i>T. gondii</i>         | 6-methyl mercaptopurine riboside, $\beta,\gamma$ -methylene-adenosine 5'-triphosphate (AMP-PCP, a nonhydrolysable ATP analog)                                                                                                                                                      | semi-closed             |
| 2PKF [7] | <i>M. tuberculosis</i>   | apo                                                                                                                                                                                                                                                                                | open                    |
| 2PKM [7] | <i>M. tuberculosis</i>   | adenosine                                                                                                                                                                                                                                                                          | closed                  |
| 2PKK [7] | <i>M. tuberculosis</i>   | 2-fluoroadenosine                                                                                                                                                                                                                                                                  | closed                  |
| 2PKN [7] | <i>M. tuberculosis</i>   | $\beta,\gamma$ -methylene-adenosine 5'-triphosphate (AMP-PCP, a nonhydrolysable ATP analog)                                                                                                                                                                                        | open                    |

## References

1. Mathews, II, Erion MD, Ealick SE (1998) Structure of human adenosine kinase at 1.5 Å resolution. *Biochemistry* 37: 15607-15620.
2. Muchmore SW, Smith RA, Stewart AO, Cowart MD, Gomtsyan A, et al. (2006) Crystal structures of human adenosine kinase inhibitor complexes reveal two distinct binding modes. *J Med Chem* 49: 6726-6731.
3. Cook WJ, DeLucas LJ, Chattopadhyay D (2000) Crystal structure of adenosine kinase from *Toxoplasma gondii* at 1.8 Å resolution. *Protein Sci* 9: 704-712.
4. Schumacher MA, Scott DM, Mathews, II, Ealick SE, Roos DS, et al. (2000) Crystal structures of *Toxoplasma gondii* adenosine kinase reveal a novel catalytic mechanism and prodrug binding. *J Mol Biol* 298: 875-893.
5. Zhang Y, El Kouni MH, Ealick SE (2006) Structure of *Toxoplasma gondii* adenosine kinase in complex with an ATP analog at 1.1 angstroms resolution. *Acta Crystallogr D Biol Crystallogr* 62: 140-145.
6. Zhang Y, El Kouni MH, Ealick SE (2007) Substrate analogs induce an intermediate conformational change in *Toxoplasma gondii* adenosine kinase. *Acta Crystallogr D Biol Crystallogr* 63: 126-134.
7. Reddy MC, Palaninathan SK, Shetty ND, Owen JL, Watson MD, et al. (2007) High resolution crystal structures of *Mycobacterium tuberculosis* adenosine kinase: insights into the mechanism and specificity of this novel prokaryotic enzyme. *J Biol Chem* 282: 27334-27342.
